# Supplementary material for: Health Utilities of Type 2 Diabetes-Related Complications: A Cross-Sectional Study in Sweden
Source: PubMed Central journal article supplement (PMC4053909; doi:10.3390/ijerph110504939), 2014-05-07
Supplement: ijerph-11-04939-s001.pdf [file ijerph-11-04939-s001.pdf]

## Health Utilities of Type 2 Diabetes-Related Complications: A Cross-Sectional Study in Sweden

**Figure S1.** Flow diagram of sample selection in the study.

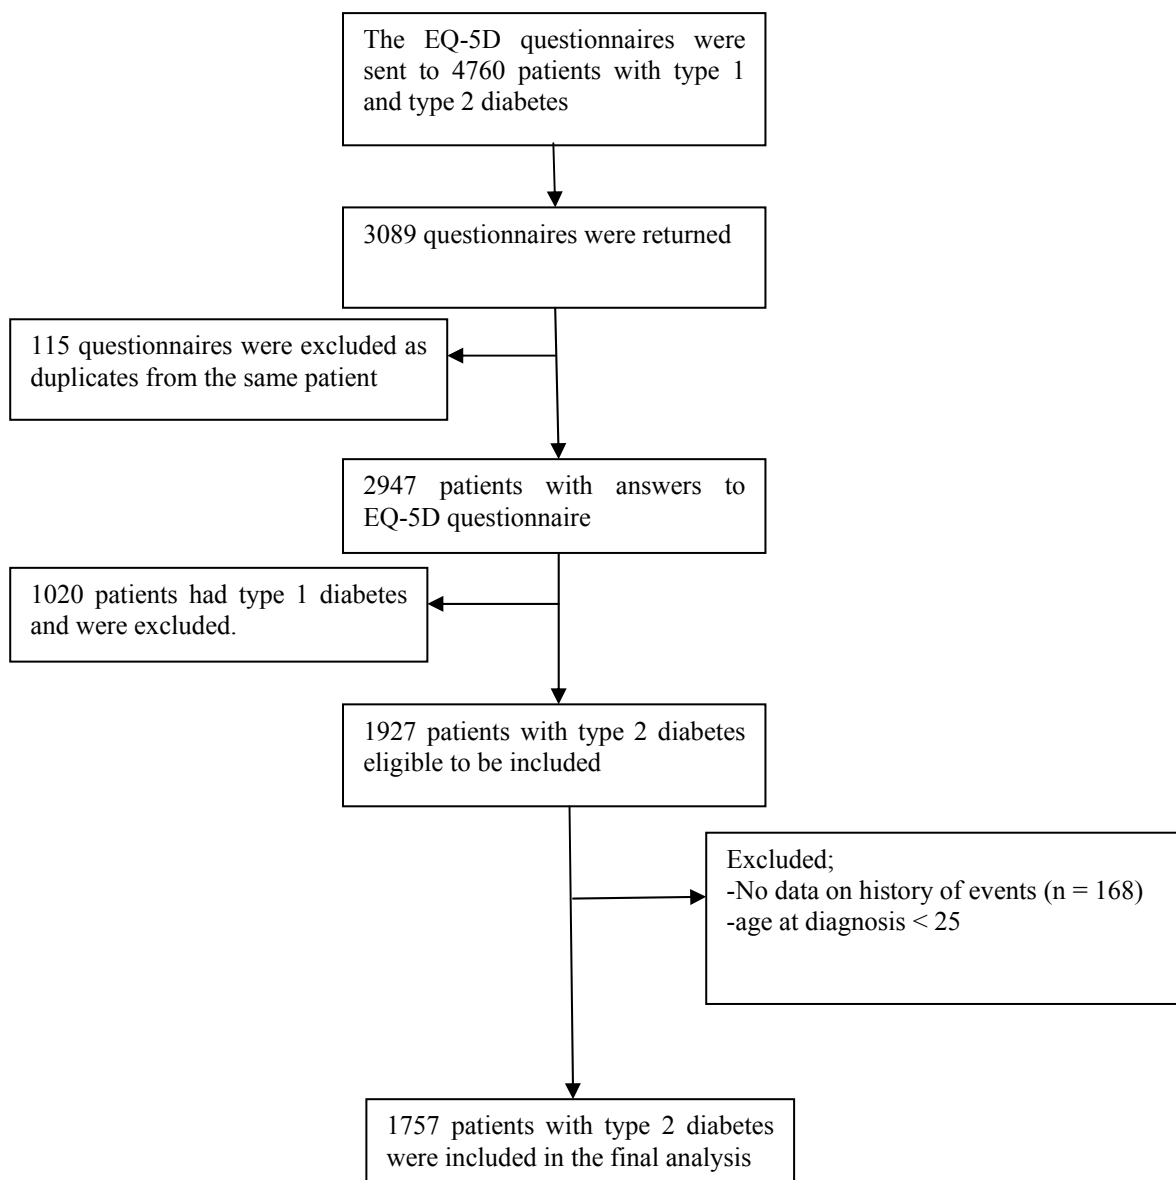

**Table S1.** Comparison of included and excluded subjects in terms of baseline characteristics.

| Variable          | Included (n = 1757) | Excluded (n = 170) | p Value of Difference |
|-------------------|---------------------|--------------------|-----------------------|
| Age               | 66.1 (8.8)          | 64.0 (11.0)        | 0.004                 |
| Age at diagnosis  | 56.5 (9.4)          | 58.4 (11.8)        | 0.02                  |
| Diabetes duration | 9.5 (7.1)           | 5.2 (7.9)          | <0.001                |
| Women (%)         | 43.3                | 48.2               | 0.21                  |
| BMI               | 30.0                | 30.0               | 0.71                  |
| EQ-5D index score | 0.77 (0.3)          | 0.78 (0.3)         | 0.58                  |

**Table S2.** Effect of diabetes-related complications on EQ-5D scores over time: results from the UK tariff.

| Variable                            | Model 1                   | Model 2                   | Model 3                   | Model 4                               |                                       |      |
|-------------------------------------|---------------------------|---------------------------|---------------------------|---------------------------------------|---------------------------------------|------|
|                                     | Coefficients <sup>a</sup> | Coefficients <sup>b</sup> | Coefficients <sup>c</sup> | Equality of Coefficients <sup>d</sup> | Equality of Coefficients <sup>d</sup> |      |
| Time since last macrovascular event |                           |                           |                           |                                       |                                       |      |
| Continuous (year)                   | 0.0066 ***                |                           |                           |                                       |                                       |      |
| No event (ref)                      |                           |                           |                           |                                       |                                       |      |
| ≤1 year                             |                           |                           | -0.0792 ***               | 0.18                                  |                                       |      |
| 2–5 years                           |                           |                           | -0.1203 ***               |                                       |                                       |      |
| >5 years                            |                           |                           | -0.0517 **                |                                       |                                       |      |
| Time since last microvascular event |                           |                           |                           |                                       |                                       |      |
| Continuous (year)                   |                           | 0.0134 *                  |                           |                                       |                                       |      |
| No event (ref)                      |                           |                           |                           |                                       |                                       |      |
| ≤1 year                             |                           |                           | -0.0978 *                 | 0.91                                  |                                       |      |
| 2–5 years                           |                           |                           | -0.0884                   |                                       |                                       |      |
| >5 years                            |                           |                           | -0.0679                   |                                       |                                       |      |
| Time since last AMI                 |                           |                           |                           |                                       |                                       |      |
| No event (ref)                      |                           |                           |                           |                                       |                                       |      |
| ≤1 year                             |                           |                           |                           |                                       | 0.0674                                | 0.13 |
| 2–5 years                           |                           |                           |                           |                                       | 0.0025                                |      |
| >5 years                            |                           |                           |                           |                                       | -0.0314                               |      |
| Time since last stroke              |                           |                           |                           |                                       |                                       |      |
| No event (ref)                      |                           |                           |                           |                                       |                                       |      |
| ≤1 year                             |                           |                           |                           |                                       | -0.0962 **                            | 0.18 |
| 2–5 years                           |                           |                           |                           |                                       | -0.2212 ***                           |      |
| >5 years                            |                           |                           |                           |                                       | -0.0708                               |      |
| Time since last HF                  |                           |                           |                           |                                       |                                       |      |
| No event (ref)                      |                           |                           |                           |                                       |                                       |      |
| ≤1 year                             |                           |                           |                           |                                       | -0.0128                               | 0.03 |
| 2–5 years                           |                           |                           |                           |                                       | -0.2193 ***                           |      |
| >5 years                            |                           |                           |                           |                                       | -0.0296                               |      |

Table S2. Cont.

| Variable                         | Model 1                   | Model 2                   | Model 3                   | Model 4                               |                                       |
|----------------------------------|---------------------------|---------------------------|---------------------------|---------------------------------------|---------------------------------------|
|                                  | Coefficients <sup>a</sup> | Coefficients <sup>b</sup> | Coefficients <sup>c</sup> | Equality of Coefficients <sup>d</sup> | Equality of Coefficients <sup>d</sup> |
| Time since last NAIHD            |                           |                           |                           |                                       |                                       |
| No event (ref)                   |                           |                           |                           |                                       |                                       |
| ≤1 year                          |                           |                           |                           |                                       | -0.0717 ** 0.80                       |
| 2–5 years                        |                           |                           |                           |                                       | -0.0622 *                             |
| >5 years                         |                           |                           |                           |                                       | -0.0451                               |
| Time since last kidney disorders |                           |                           |                           |                                       |                                       |
| No event (ref)                   |                           |                           |                           |                                       |                                       |
| ≤1 year                          |                           |                           |                           |                                       | -0.1624 ** 0.50                       |
| 2–5 years                        |                           |                           |                           |                                       | -0.1629 **                            |
| >5 years                         |                           |                           |                           |                                       | -0.0656                               |
| Time since last retinopathy      |                           |                           |                           |                                       |                                       |
| No event (ref)                   |                           |                           |                           |                                       |                                       |
| ≤1 year                          |                           |                           |                           |                                       | -0.0329 0.64                          |
| 2–5 years                        |                           |                           |                           |                                       | 0.0248                                |
| >5 years                         |                           |                           |                           |                                       | -0.0224                               |
| R                                | 0.04                      | 0.17                      | 0.06                      |                                       | 0.08                                  |
| N                                | 425                       | 87                        | 1757                      |                                       | 1757                                  |

\*, \*\*, \*\*\*: significant at 10%, 5%, and 1%, respectively. <sup>a</sup> Additionally adjusted for gender, age at diagnosis, BMI, duration of diabetes, treatment, and history of microvascular complications. <sup>b</sup> Additionally adjusted for gender, age at diagnosis, BMI, duration of diabetes, treatment, and history of macrovascular complications. <sup>c</sup> Additionally adjusted for gender, age at diagnosis, BMI, duration of diabetes, and treatment. <sup>d</sup> We used the *test* command in STATA to check if the estimated coefficients were significantly different.

**Table S3.** Factors associated with variation in EQ-5D score: results from the Swedish tariff.

| Variable                        | Women       |             | Men         |             | Total       |             |
|---------------------------------|-------------|-------------|-------------|-------------|-------------|-------------|
|                                 | Model 1     | Model 2     | Model 1     | Model 2     | Model 1     | Model 2     |
| Constant                        | 0.8692 ***  | 0.8666 ***  | 0.9048 ***  | 0.9050 ***  | 0.8991 ***  | 0.8974 ***  |
| Female gender                   | NA          | NA          | NA          | NA          | -0.0266 *** | -0.0260 *** |
| Age at diagnosis                | 0.0004      | 0.0004      | 0.0008 *    | 0.0009 *    | 0.0006 *    | 0.0006 *    |
| Diabetes duration               | -0.0005     | -0.0007     | -0.0006     | -0.0004     | -0.0006     | -0.0005     |
| BMI                             | -0.0030 *** | -0.0030 *** | -0.0024 *** | -0.0023 *** | -0.0027 *** | -0.0027 *** |
| History of macrovascular events | -0.0338 **  |             | -0.0478 *** |             | -0.0430 *** |             |
| History of microvascular events | -0.0702 *** |             | -0.0118     |             | -0.0348 **  |             |
| AMI history                     |             | -0.0003     |             | -0.0182     |             | -0.0119     |
| Stroke history                  |             | -0.0551 *** |             | -0.0635 *** |             | -0.0590 *** |
| HF history                      |             | -0.0294     |             | -0.0514 **  |             | -0.0422 *** |
| NAIHD history                   |             | -0.0217     |             | -0.0270 **  |             | -0.0249 *** |
| Kidney disorders history        |             | -0.1036 *** |             | 0.0076      |             | -0.0406*    |
| Retinopathy history             |             | 0.0004      |             | -0.0211     |             | -0.0103     |
| Treatment                       |             |             |             |             |             |             |
| Diet (ref)                      |             |             |             |             |             |             |
| OHA                             | 0.0046      | 0.0068      | -0.0080     | -0.0084     | -0.0009     | 0.0000      |
| Insulin ± OHA                   | 0.0038      | 0.0065      | -0.0045     | -0.0048     | 0.0009      | 0.0020      |
| R-squared                       | 0.06        | 0.07        | 0.06        | 0.07        | 0.06        | 0.07        |
| N                               | 760         | 760         | 997         | 997         | 1757        | 1757        |

\*, \*\*, \*\*\*: significant at 10%, 5%, and 1%, respectively.

**Table S4.** Effect of single and multiple events on EQ-5D score: results from the Swedish tariff.

| Variable             | Model 1                   |                                       | Model 2                   |                                       |
|----------------------|---------------------------|---------------------------------------|---------------------------|---------------------------------------|
|                      | Coefficients <sup>a</sup> | Equality of coefficients <sup>b</sup> | Coefficients <sup>a</sup> | Equality of coefficients <sup>b</sup> |
| Macrovascular events |                           |                                       |                           |                                       |
| No (ref)             |                           |                                       |                           |                                       |
| Single               | -0.0314 ***               | 0.12                                  |                           |                                       |
| Multiple             | -0.0505 ***               |                                       |                           |                                       |
| Microvascular events |                           |                                       |                           |                                       |
| No (ref)             |                           |                                       |                           |                                       |
| Single               | -0.0311                   | 0.84                                  |                           |                                       |
| Multiple             | -0.0364 **                |                                       |                           |                                       |
| AMI                  |                           |                                       |                           |                                       |
| No (ref)             |                           |                                       |                           |                                       |
| Single               |                           |                                       | -0.0113                   | 0.97                                  |
| Multiple             |                           |                                       | -0.0121                   |                                       |
| Stroke               |                           |                                       |                           |                                       |
| No (ref)             |                           |                                       |                           |                                       |
| Single               |                           |                                       | -0.0460 ***               | 0.05                                  |
| Multiple             |                           |                                       | -0.1217 ***               |                                       |
| NAIHD                |                           |                                       |                           |                                       |
| No (ref)             |                           |                                       |                           |                                       |
| Single               |                           |                                       | -0.0035                   | 0.05                                  |
| Multiple             |                           |                                       | -0.0352 ***               |                                       |

\*\*, \*\*\*: significant at 5%, and 1%, respectively. <sup>a</sup> Additionally adjusted for gender, age at diagnosis, BMI, duration of diabetes, treatment, history of heart failure, retinopathy, and kidney disorders. <sup>b</sup> We used the test command in STATA to check if the estimated coefficients were significantly different.

**Table S5.** Effect of diabetes-related complications on EQ-5D scores over time: results from the Swedish tariff.

| Variable                            | Model 1                   | Model 2                   | Model 3                   |                                       | Model 4                   |                                       |
|-------------------------------------|---------------------------|---------------------------|---------------------------|---------------------------------------|---------------------------|---------------------------------------|
|                                     | Coefficients <sup>a</sup> | Coefficients <sup>b</sup> | Coefficients <sup>c</sup> | Equality of coefficients <sup>d</sup> | Coefficients <sup>c</sup> | Equality of coefficients <sup>d</sup> |
| Time since last macrovascular event | 0.0032 ***                |                           |                           |                                       |                           |                                       |
| Continuous (year)                   |                           |                           |                           |                                       |                           |                                       |
| No event (ref)                      |                           |                           |                           |                                       |                           |                                       |
| ≤1 year                             |                           |                           | -0.0479 ***               | 0.16                                  |                           |                                       |
| 2–5 years                           |                           |                           | -0.0556 ***               |                                       |                           |                                       |
| >5 years                            |                           |                           | -0.0283 **                |                                       |                           |                                       |
| Time since last microvascular event |                           | 0.0042                    |                           |                                       |                           |                                       |
| Continuous (year)                   |                           |                           |                           |                                       |                           |                                       |
| No event (ref)                      |                           |                           |                           |                                       |                           |                                       |
| ≤1 year                             |                           |                           | -0.0239                   | 0.76                                  |                           |                                       |
| 2–5 years                           |                           |                           | -0.0354                   |                                       |                           |                                       |
| >5 years                            |                           |                           | -0.0475 **                |                                       |                           |                                       |
| Time since last AMI                 |                           |                           |                           |                                       |                           |                                       |
| No event (ref)                      |                           |                           |                           |                                       |                           |                                       |
| ≤1 year                             |                           |                           |                           |                                       | 0.0110                    | 0.42                                  |
| 2–5 years                           |                           |                           |                           |                                       | 0.0084                    |                                       |
| >5 years                            |                           |                           |                           |                                       | -0.0135                   |                                       |
| Time since last stroke              |                           |                           |                           |                                       |                           |                                       |
| No event (ref)                      |                           |                           |                           |                                       |                           |                                       |
| ≤1 year                             |                           |                           |                           |                                       | -0.0696 ***               | 0.44                                  |
| 2–5 years                           |                           |                           |                           |                                       | -0.0848 ***               |                                       |
| >5 years                            |                           |                           |                           |                                       | -0.0429 **                |                                       |

Table S5. Cont.

| Variable                         | Model 1                   | Model 2                   | Model 3                   |                                       | Model 4                   |                                       |
|----------------------------------|---------------------------|---------------------------|---------------------------|---------------------------------------|---------------------------|---------------------------------------|
|                                  | Coefficients <sup>a</sup> | Coefficients <sup>b</sup> | Coefficients <sup>c</sup> | Equality of coefficients <sup>d</sup> | Coefficients <sup>c</sup> | Equality of coefficients <sup>d</sup> |
| Time since last HF               |                           |                           |                           |                                       |                           |                                       |
| No event (ref)                   |                           |                           |                           |                                       |                           |                                       |
| ≤1 year                          |                           |                           |                           |                                       | -0.0114                   | 0.01                                  |
| 2–5 years                        |                           |                           |                           |                                       | -0.1123 ***               |                                       |
| >5 years                         |                           |                           |                           |                                       | -0.0196                   |                                       |
| Time since last NAIHD            |                           |                           |                           |                                       |                           |                                       |
| No event (ref)                   |                           |                           |                           |                                       |                           |                                       |
| ≤1 year                          |                           |                           |                           |                                       | -0.0290 **                | 0.88                                  |
| 2–5 years                        |                           |                           |                           |                                       | -0.0318 **                |                                       |
| >5 years                         |                           |                           |                           |                                       | -0.0224 *                 |                                       |
| Time since last kidney disorders |                           |                           |                           |                                       |                           |                                       |
| No event (ref)                   |                           |                           |                           |                                       |                           |                                       |
| ≤1 year                          |                           |                           |                           |                                       | -0.0459                   | 0.94                                  |
| 2–5 years                        |                           |                           |                           |                                       | -0.0615 *                 |                                       |
| >5 years                         |                           |                           |                           |                                       | -0.0465                   |                                       |
| Time since last retinopathy      |                           |                           |                           |                                       |                           |                                       |
| No event (ref)                   |                           |                           |                           |                                       |                           |                                       |
| ≤1 year                          |                           |                           |                           |                                       | 0.0063                    | 0.52                                  |
| 2–5 years                        |                           |                           |                           |                                       | -0.0046                   |                                       |
| >5 years                         |                           |                           |                           |                                       | -0.0358                   |                                       |
| R                                | 0.05                      | 0.17                      | 0.07                      |                                       | 0.09                      |                                       |
| N                                | 425                       | 87                        | 1757                      |                                       | 1757                      |                                       |

\*, \*\*, \*\*\*: significant at 10%, 5%, and 1%, respectively. <sup>a</sup> Additionally adjusted for gender, age at diagnosis, BMI, duration of diabetes, treatment, and history of microvascular complications. <sup>b</sup> Additionally adjusted for gender, age at diagnosis, BMI, duration of diabetes, treatment, and history of macrovascular complications. <sup>c</sup> Additionally adjusted for gender, age at diagnosis, BMI, duration of diabetes, and treatment. <sup>d</sup> We used the *test* command in STATA to check if the estimated coefficients were significantly different.
